# Supplementary material
Source: publisher figshare collection journal article supplement (https://karger.figshare.com/articles/dataset/_/5241673)
Supplement: Supplementary file 1 [file 1]

## Erratum

---

In the article by Nascimento AF, Alves GJ, Massoco CO, Teodorov E, Felicio LF and Bernardi MM, entitled 'Lipopolysaccharide-Induced Sickness Behavior in Lactating Rats Decreases Ultrasonic Vocalizations and Exacerbates Immune System Activity in Male Offspring' [Neuroimmunomodulation 2015;22, DOI: 10.1159/000363350], an error occurred in table 1 and in the text.

Please find below the corrected table row and text passage.

| Parameter                         | Groups       |              | p     |
|-----------------------------------|--------------|--------------|-------|
|                                   | control      | experimental |       |
| Maternal behavior                 |              |              |       |
| Latency to retrieve of 3rd pup, s | 395.26±27.27 | 191.80±56.10 | 0.001 |

Section Discussion, page 6, second column, second paragraph, line 7 from the bottom: Therefore, the decrease in the latency to retrieve the third pup observed in lactating LPS-treated rats in the present study may be attributable to a slight improvement in maternal care.

### Acknowledgement

L.F.F. was supported by FAPESP (Grant #2013/01610-7).
